# Supplementary material
Source: MDPI journal article supplement (https://www.mdpi.com/2071-1050/11/3/734)
Supplement: s1 [file s1]

## Sheet: Introduction
Supplementary Materials
Method for quantitative evaluation of sustainability measures: a systems approach for policy prioritization
Alexandra Lavers Westin, Yuliya Kalmykova, and Leonardo Rosado
Part A: Fuel scenario assumptions
Part B: Electronic devices

## Sheet: Part A
Supplementary Materials: Part A
Fuel scenario assumptions
Population increase as projected (7400 more inhabitants per year until 2035)
SA.1 Climate change assumptions
	kg CO2-eq per L fuel		Reference		[34]
Gasoline	2.77		Trafikverket. (2017). Handbok för vägtrafikens luftföroreningar: Bilaga 6.1 Emissions faktorer, bränsleförbruking och trafikarbete för år 2016. Retrieved from https://www.trafikverket.se/contentassets/3c85ef29f30b4f58aa895dc52efbb14a/handbok-for-vagtrafikens-luftfororeningar/kapitel_6_emissionsfaktorer_bilagor2016_2020_2030_20170504.pdf
Diesel	2.55		Trafikverket. (2017). Handbok för vägtrafikens luftföroreningar: Bilaga 6.1 Emissions faktorer, bränsleförbruking och trafikarbete för år 2016. Retrieved from https://www.trafikverket.se/contentassets/3c85ef29f30b4f58aa895dc52efbb14a/handbok-for-vagtrafikens-luftfororeningar/kapitel_6_emissionsfaktorer_bilagor2016_2020_2030_20170504.pdf
Ethanol (E85)	1.12		Trafikverket. (2017). Handbok för vägtrafikens luftföroreningar: Bilaga 6.1 Emissions faktorer, bränsleförbruking och trafikarbete för år 2016. Retrieved from https://www.trafikverket.se/contentassets/3c85ef29f30b4f58aa895dc52efbb14a/handbok-for-vagtrafikens-luftfororeningar/kapitel_6_emissionsfaktorer_bilagor2016_2020_2030_20170504.pdf
Natural Gas	0.00267		Trafikverket. (2017). Handbok för vägtrafikens luftföroreningar: Bilaga 6.1 Emissions faktorer, bränsleförbruking och trafikarbete för år 2016. Retrieved from https://www.trafikverket.se/contentassets/3c85ef29f30b4f58aa895dc52efbb14a/handbok-for-vagtrafikens-luftfororeningar/kapitel_6_emissionsfaktorer_bilagor2016_2020_2030_20170504.pdf
Plug-in electric	2.737		85% gasoline, 15% diesel
Electric hybrid	2.737		85% gasoline, 15% diesel
Electric	kg CO2/kWh	0.0046	Moro, SA., & Lonza, L. (2017, October 1). Electricity carbon intensity in European Member States: Impacts on GHG emissions of electric vehicles. Transportation Research Part D: Transport and Environment. Elsevier Ltd. https://doi.org/10.1016/j.trd.2017.07.012
			[33]
SA.2 Acidification assumptions
	Life cycle impact of a small family car (lifetime). Assumes lifetime driven distance of 230.500 km.
	Air acidification over lifetime ( kg H+-eq)	per km/driven	Reference: Messagie, M., Boureima, F., Matheys, J., Sergeant, N., Turcksin, L., Macharis, C., & Van Mierlo, J. (2010). Life cycle assessment of conventional and alternative small passenger vehicles in Belgium. In 2010 IEEE Vehicle Power and Propulsion Conference, VPPC 2010. https://doi.org/10.1109/VPPC.2010.5729233
BEV	1.78	7.72234e-06	[35]
Hybrid	3.58	1.55315e-05
LPG	3	1.30152e-05
Diesel	3.82	1.65727e-05
Gasoline	4.005	1.73753e-05
SA.3 Eutrophication assumptions
	Life cycle impact of a small family car (lifetime). Assumes lifetime driven distance of 230.500 km.
	eutrophication over lifespan (g eq PO4)	per km/driven		Reference: Messagie, M., Boureima, F., Matheys, J., Sergeant, N., Turcksin, L., Macharis, C., & Van Mierlo, J. (2010). Life cycle assessment of conventional and alternative small passenger vehicles in Belgium. In 2010 IEEE Vehicle Power and Propulsion Conference, VPPC 2010. https://doi.org/10.1109/VPPC.2010.5729233
BEV	5.74	2.49024e-05		[35]
Hybrid	9.84	4.26898e-05
LPG	8.64	3.74837e-05
Diesel	13.78	5.97831e-05
Gasoline	10.955	4.75271e-05
SA.4: Fuel efficiency assumptions
	Average fuel efficiency for fleet (L/km)				2017	2018	2019	2020	2021	2022	2023	2024	2025	2026	2027	2028	2029	2030	2031	2032	2033	2034	2035
	Gasoline				8.12814	8.00724	7.86711	7.70485	7.52251	7.32777	7.13156	6.93669	6.74642	6.56423	6.39154	6.23035	6.08167	5.9433	5.81513	5.69705	5.58927	5.49081	5.39804
	Diesel				5.98234	5.89592	5.79726	5.688	5.56877	5.44693	5.33207	5.22356	5.12106	5.02448	4.93325	4.84702	4.76573	4.68921	4.61734	4.55002	4.487	4.42789	4.37228
	Ethanol				11.6246	11.5797	11.5064	11.3988	11.2518	11.0664	10.8519	10.6159	10.365	10.1082	9.85258	9.60452	9.369	9.14982	8.94903	8.76671	8.602	8.45365	8.31983
	Natural Gas				6.99088	6.82007	6.65028	6.48024	6.30407	6.13225	5.9785	5.83917	5.71179	5.59571	5.48994	5.39275	5.30303	5.21969	5.14205	5.06969	5.00212	4.93895	4.87958
	Plug-in electric				8.12814	8.00724	7.86711	7.70485	7.52251	7.32777	7.13156	6.93669	6.74642	6.56423	6.39154	6.23035	6.08167	5.9433	5.81513	5.69705	5.58927	5.49081	5.39804
	Electric hybrid				3.66851	3.58699	3.50037	3.38654	3.31275	3.23327	3.16518	3.10766	3.05906	3.01722	2.98063	2.94803	2.91843	2.89106	2.86205	2.83695	2.81293	2.7899	2.76751
	Electric	kWh/10 km			2	2	2	2	2	2	2	2	2	2	2	2	2	2	2	2	2	2	2
Reference: [26]	Energimyndigheten. (2017). Scenarier över Sveriges energisystem 2016. Er 2017:06 (p. 112). https://doi.org/10.1016/j.talantSA.2015.05.070
SA.5 Scenario 1a Fleet
SEA					2017	2018	2019	2020	2021	2022	2023	2024	2025	2026	2027	2028	2029	2030	2031	2032	2033	2034	2035
	Population				564039	571439	578839	586239	593639	601039	608439	615839	623239	630639	638039	645439	652839	660239	667639	675039	682439	689839	697239
	Number personal vehicles				190399	192493	194611	196752	198916	201104	203316	205552	207814	210100	212411	214747	217109	219498	221912	224353	226821	229316	231838
	Number new personal vehicles per year					2094.39	2117.43	2140.72	2164.27	2188.07	2212.14	2236.48	2261.08	2285.95	2311.09	2336.52	2362.22	2388.2	2414.47	2441.03	2467.88	2495.03	2522.48
	Percentage of newly registered cars
	Gasoline				0.42	0.41951	0.394007	0.369841	0.346855	0.325052	0.30425	0.284408	0.265445	0.247285	0.229728	0.212764	0.196295	0.180268	0.164595	0.149244	0.13417	0.119327	0.104671
	Diesel				0.48	0.446743	0.454731	0.459463	0.461235	0.460254	0.456817	0.451139	0.443455	0.434018	0.423044	0.410751	0.397329	0.382959	0.367789	0.35198	0.335672	0.318973	0.301979
	Ethanol				0.002	0.0244199	0.0211914	0.0182209	0.0155101	0.0130726	0.0108932	0.00897404	0.00730627	0.00587418	0.0046477	0.00361596	0.00275788	0.00205634	0.00149122	0.00104651	0.000705629	0.00045319	0.000274814
	Natural Gas				0.014	0.0108614	0.0109575	0.0110295	0.0110834	0.0111226	0.0111496	0.0111661	0.0111739	0.0111751	0.0111716	0.0111643	0.0111545	0.0111428	0.0111302	0.011117	0.0111039	0.0110911	0.0110789
	Plug-in electric hybrid				0.024	0.0418807	0.0512571	0.0615043	0.0725408	0.0833756	0.0948445	0.106857	0.119338	0.132212	0.145299	0.158674	0.172295	0.186114	0.200099	0.214102	0.2282	0.24237	0.256593
	Electric hybrid				0.052	0.047303	0.0560094	0.065454	0.0755692	0.0857113	0.0963886	0.107525	0.119055	0.130915	0.142994	0.155316	0.167846	0.180539	0.193374	0.206244	0.219186	0.23218	0.245212
	Electric				0.008	0.00928238	0.0118469	0.0144869	0.0172064	0.021412	0.0256572	0.0299322	0.0342261	0.0385199	0.0431161	0.0477152	0.0523221	0.0569205	0.0615223	0.0662667	0.070962	0.0756053	0.0801925
Reference: [26]	Energimyndigheten. (2017). Scenarier över Sveriges energisystem 2016. Er 2017:06 (p. 112). https://doi.org/10.1016/j.talantSA.2015.05.070
SA.6 Scenario 1b Fleet
STA
		Percentage of Fleet
		Gasoline			0.56595	0.5378	0.510051	0.4815	0.45335	0.4252	0.39705	0.3689	0.34075	0.3126	0.28445	0.2563	0.22815	0.2	0.17185	0.1437	0.11555	0.0874	0.05925
		Diesel			0.33714	0.326206	0.315521	0.304338	0.293405	0.282471	0.271537	0.260603	0.249669	0.238735	0.227802	0.216868	0.205934	0.19995	0.189397	0.178844	0.168291	0.157738	0.147185
		Ethanol			0.04511	0.0431785	0.0412794	0.0393154	0.0373838	0.0354523	0.0335208	0.0315892	0.0296577	0.0277262	0.0257946	0.0238631	0.0219315	0.02	0.0180685	0.0161369	0.0142054	0.0122738	0.0103423
		Natural Gas			0.01587	0.0161877	0.0165184	0.0168231	0.0171408	0.0174585	0.0177762	0.0180938	0.0184115	0.0187292	0.0190469	0.0193646	0.0196823	0.02	0.0203177	0.0206354	0.0209531	0.0212708	0.0215885
		Plug-in electric			0.00843	0.0177815	0.0271544	0.0364846	0.0458362	0.0551877	0.0645392	0.0738908	0.0832423	0.0925938	0.101945	0.111297	0.120648	0.13	0.139352	0.148703	0.158055	0.167406	0.176758
		Electric hybrid			0.0234	0.0500615	0.0767835	0.103385	0.130046	0.156708	0.183369	0.210031	0.236692	0.263354	0.290015	0.316677	0.343338	0.37	0.396662	0.423323	0.449985	0.476646	0.503308
		Electric			0.00402	0.00832615	0.0126423	0.0169385	0.0212446	0.0255508	0.0298569	0.0341631	0.0384692	0.0427754	0.0470815	0.0513877	0.0556938	0.06	0.0643062	0.0686123	0.0729185	0.0772246	0.0815308
Reference: [29]	Trafikanalys. (2017). Prognoser för fordonsflottans Rapport utveckling i Sverige 2017:8.

## Sheet: Part B
Supplementary Materials Part B Electronics scenario assumptions
SB.1 Climate change assumptions
Item	Unit	Assumed lifetime in LCA (years)	Impact over lifespan		Impact/ year		Reference	Date	Title/Link
Laptops	1 laptop	4	306	kg co2 eq/unit	76.5	kg co2 eq/unit/year	Apple	2017	https://www.apple.com/environment/pdf/products/notebooks/12-inch_MacBook_PER_June2017.pdf					[38]
Cell phones	1 phone	3	56	kg co2 eq/unit	18.6667	kg co2 eq/unit/year	Apple	2017	http://images.apple.com/environment/pdf/products/iphone/iPhone_7_PER_sept2016.pdf					[39]
Tablets	1 tablet	3	135	kg co2 eq/unit	45	kg co2 eq/unit/year	Apple	2017	https://www.apple.com/environment/pdf/products/ipad/iPad_PER_mar2017.pdf					[40]
Monitors	1 monitor	6	412	kg co2 eq/unit	68.6667	kg co2 eq/unit/year	Dell	2018	https://i.dell.com/sites/csdocuments/CorpComm_Docs/en/carbon-footprint-SE2416H-monitor.pdf?newtab=true					[41]
SB.2 Acidification assumptions
Laptops	1 laptop	4	1.27575	mol H+ eq/unit	0.318937	mol H+-eq/unit/year	1. Guvendik, M. From Smartphone to Futurephone. 2014, 103., 2. Ercan, M.; Malmodin, J.; Bergmark, P.; Kimfalk, E.; Nilsson, E. Life Cycle Assessment of a Smartphone. Proc. ICT Sustain. 2016 2016, doi:10.2991/ict4s-16.2016.15., 3. 1. Moberg, Å.; Borggren, C.; Ambell, C.; Finnveden, G.; Guldbrandsson, F.; Bondesson, SA.; Malmodin, J.; Bergmark, P. Simplifying a life cycle assessment of a mobile pho…							[42-46]
Cell phones	1 phone	3	1.49375	mol H+ eq/unit	0.497917	mol H+-eq/unit/year
Monitors	1 monitor	6	92.4375	mol H+ eq/unit	15.4062	mol H+-eq/unit/year
SB.3 Eutrophication assumptions
Laptops	1 laptop	4	0.375	kg P-eq/unit	0.09375	kg P-eq/unit/year
Cell phones	1 phone	3	0.00726341	kg P-eq/unit	0.00242114	kg P-eq/unit/year
Monitors	1 monitor	6	0.0160357	kg P-eq/unit	0.00267261	kg P-eq/unit/year
